# Supplementary material
Source: MDPI journal article supplement (https://www.mdpi.com/2227-9040/9/6/150)
Supplement: s1 [file s1]

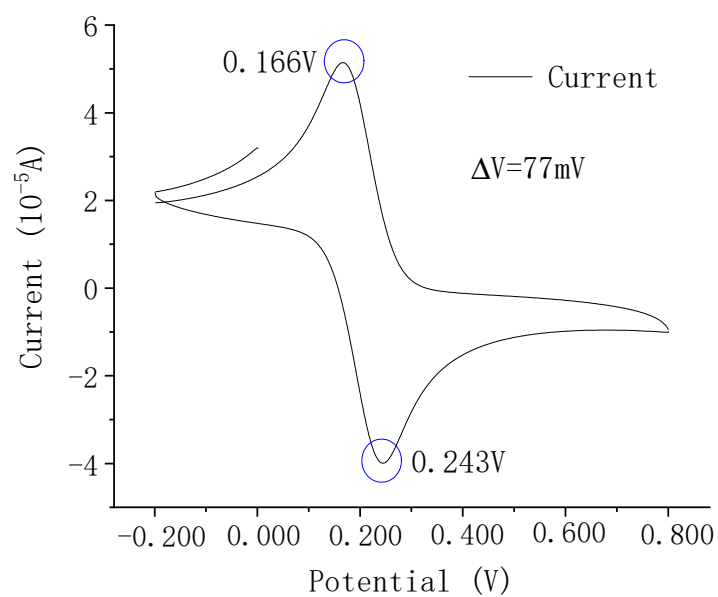

**Figure S1.** Test chart of polished glassy carbon electrode.

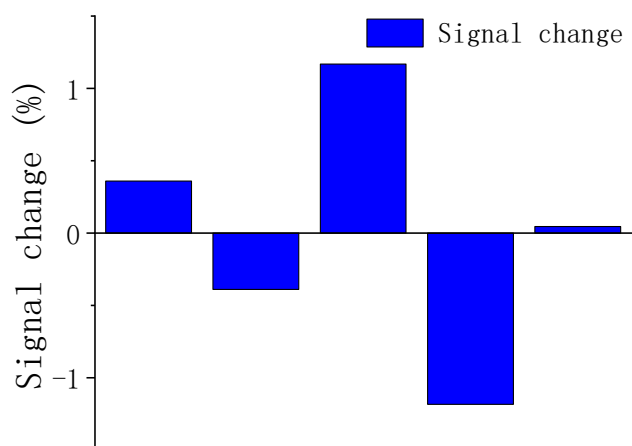

**Figure S2.** Repetitive Study of Modified Electrode.

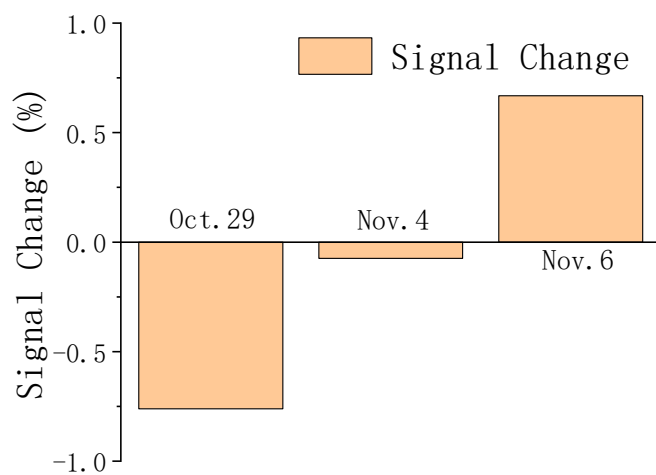

**Figure S3.** Stability Study of Modified Electrode.
