# Supplementary material
Source: MDPI journal article supplement (https://www.mdpi.com/2227-9040/9/6/150)
Supplement: s1 [file s1]

EDS Layered Image 3

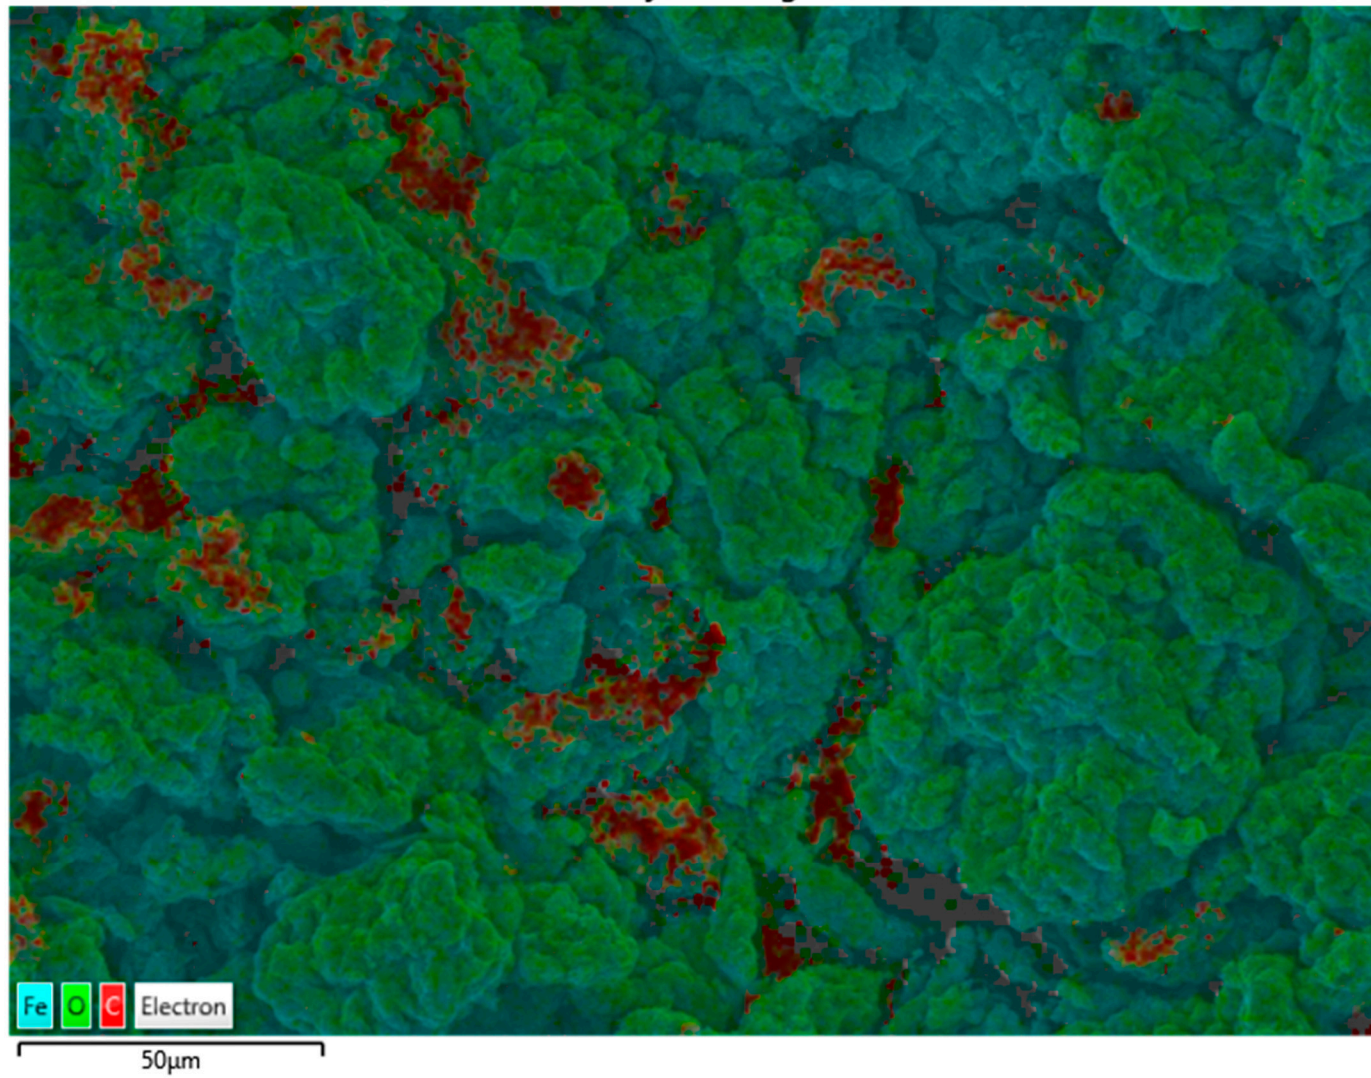

Electron Image 5

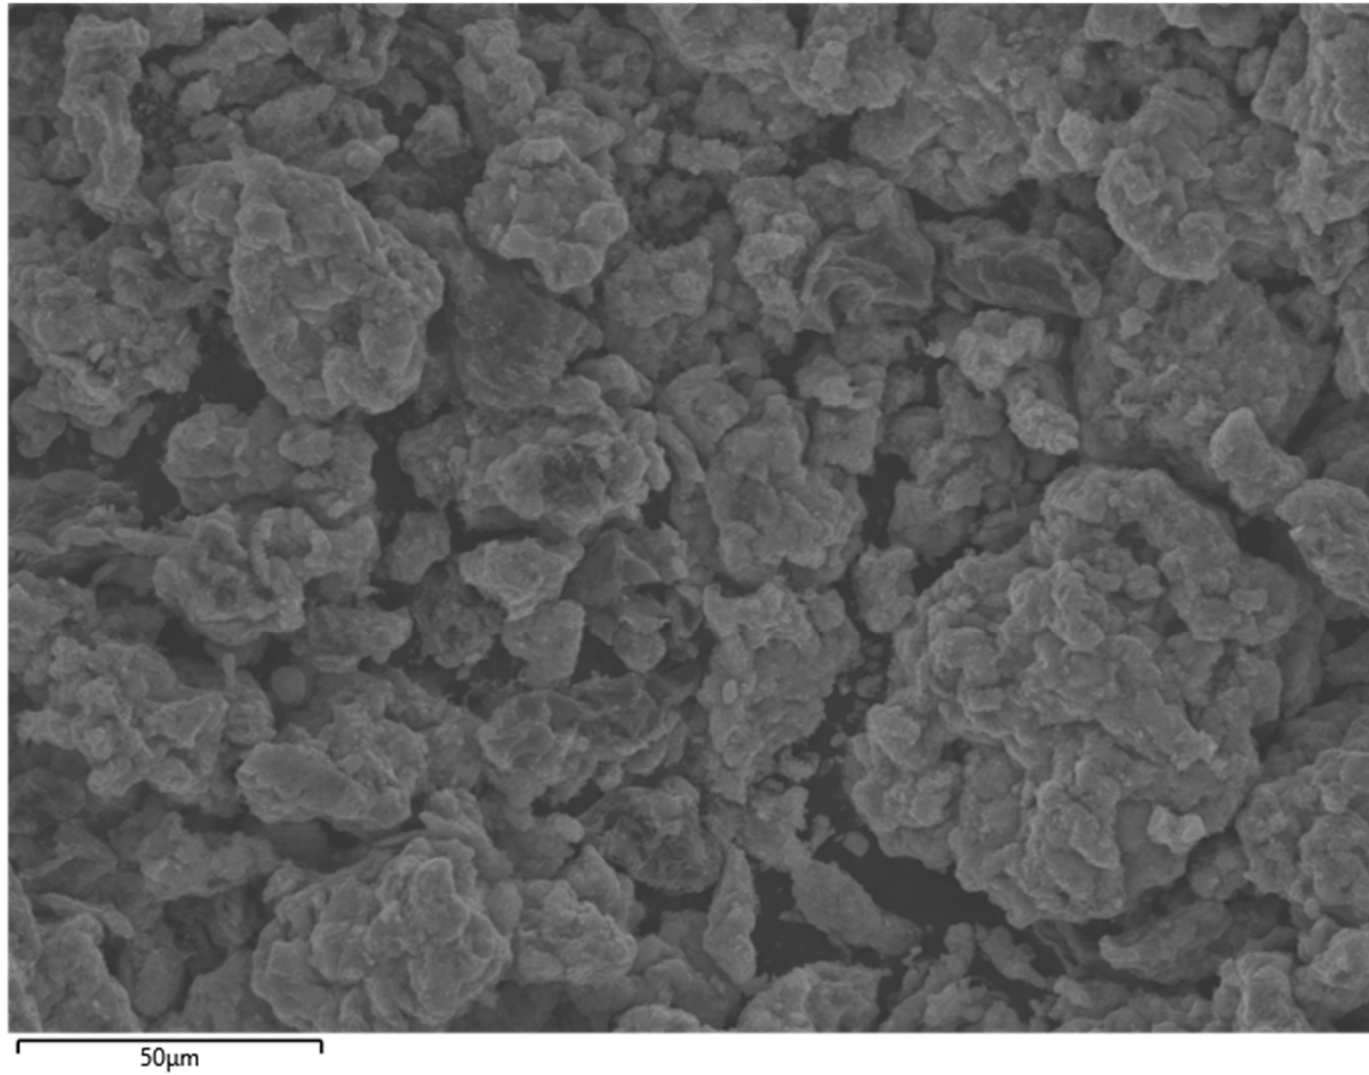

C K $\alpha$ 1\_2

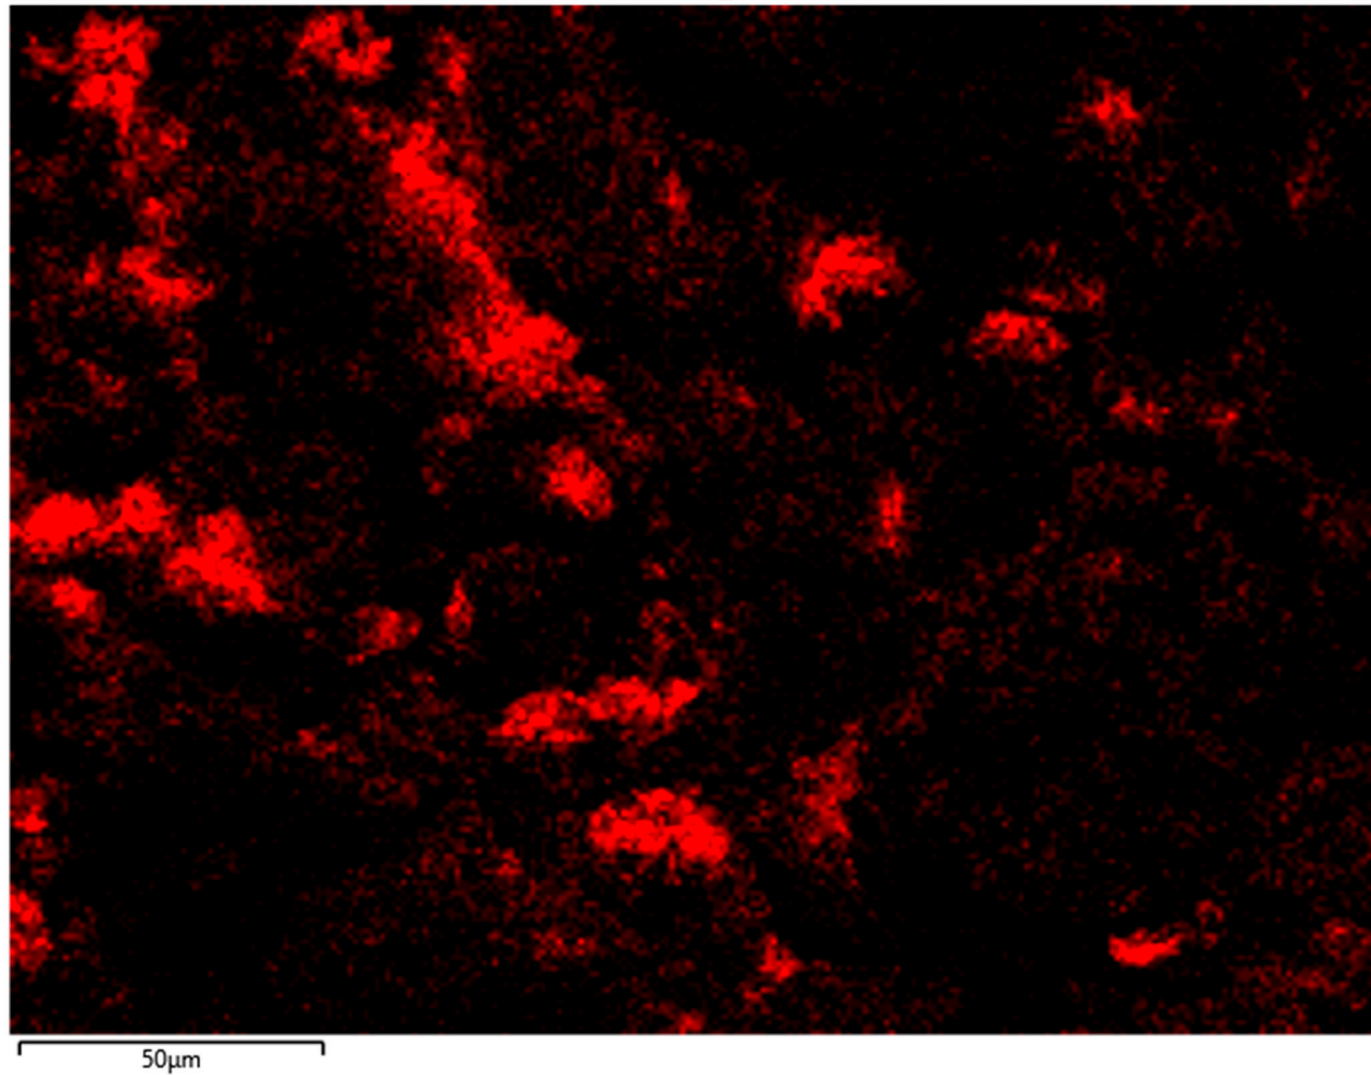



Fe K $\alpha$ 1

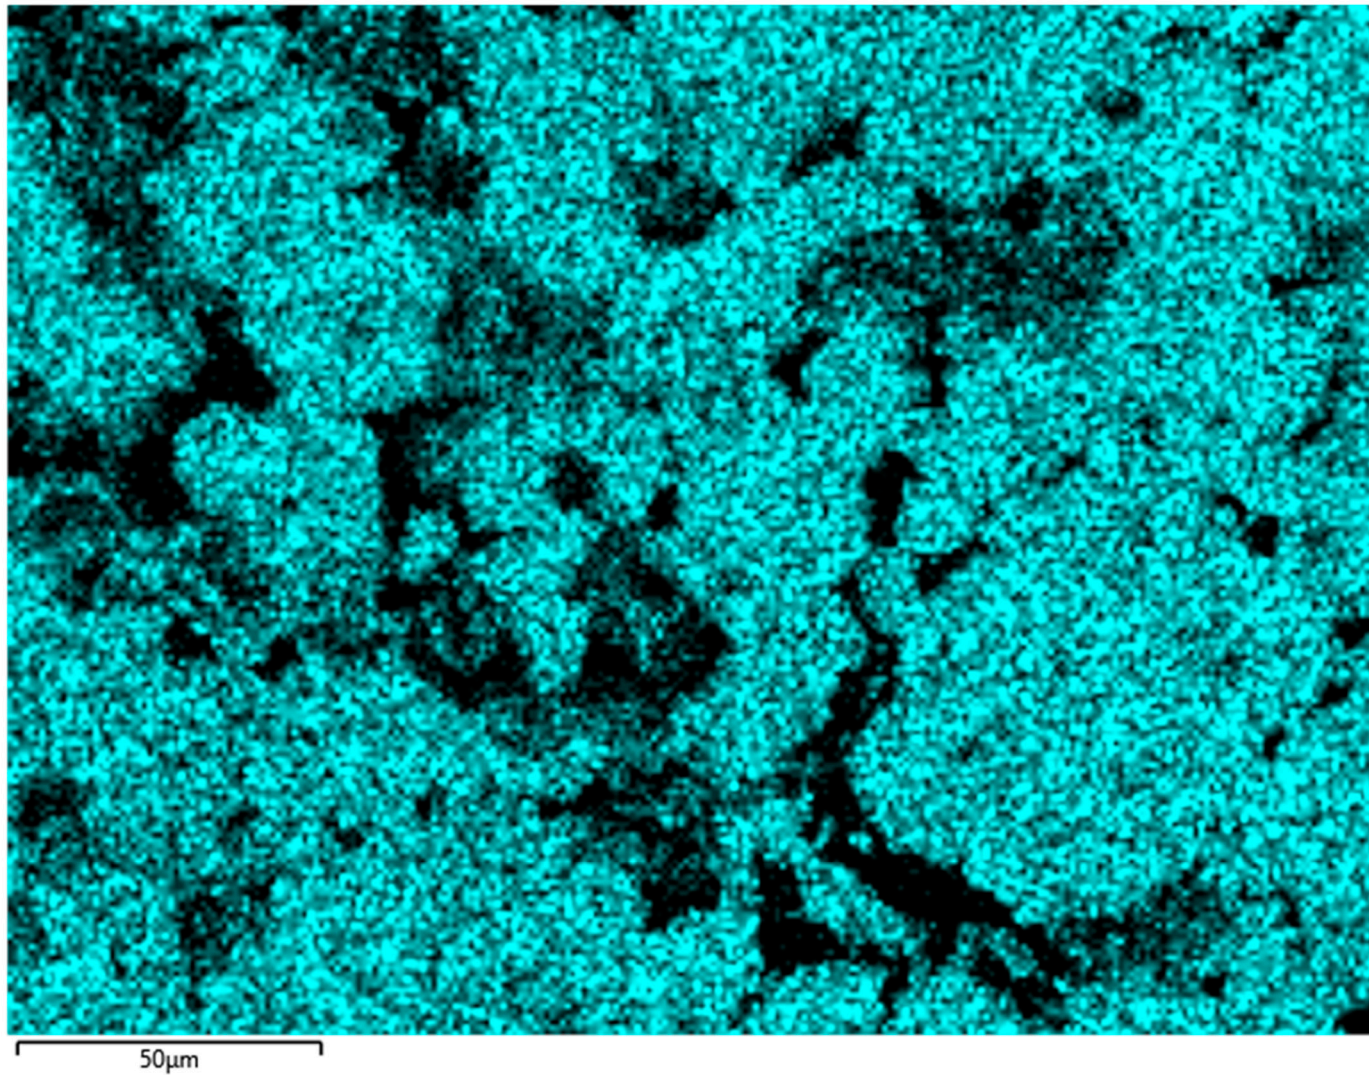

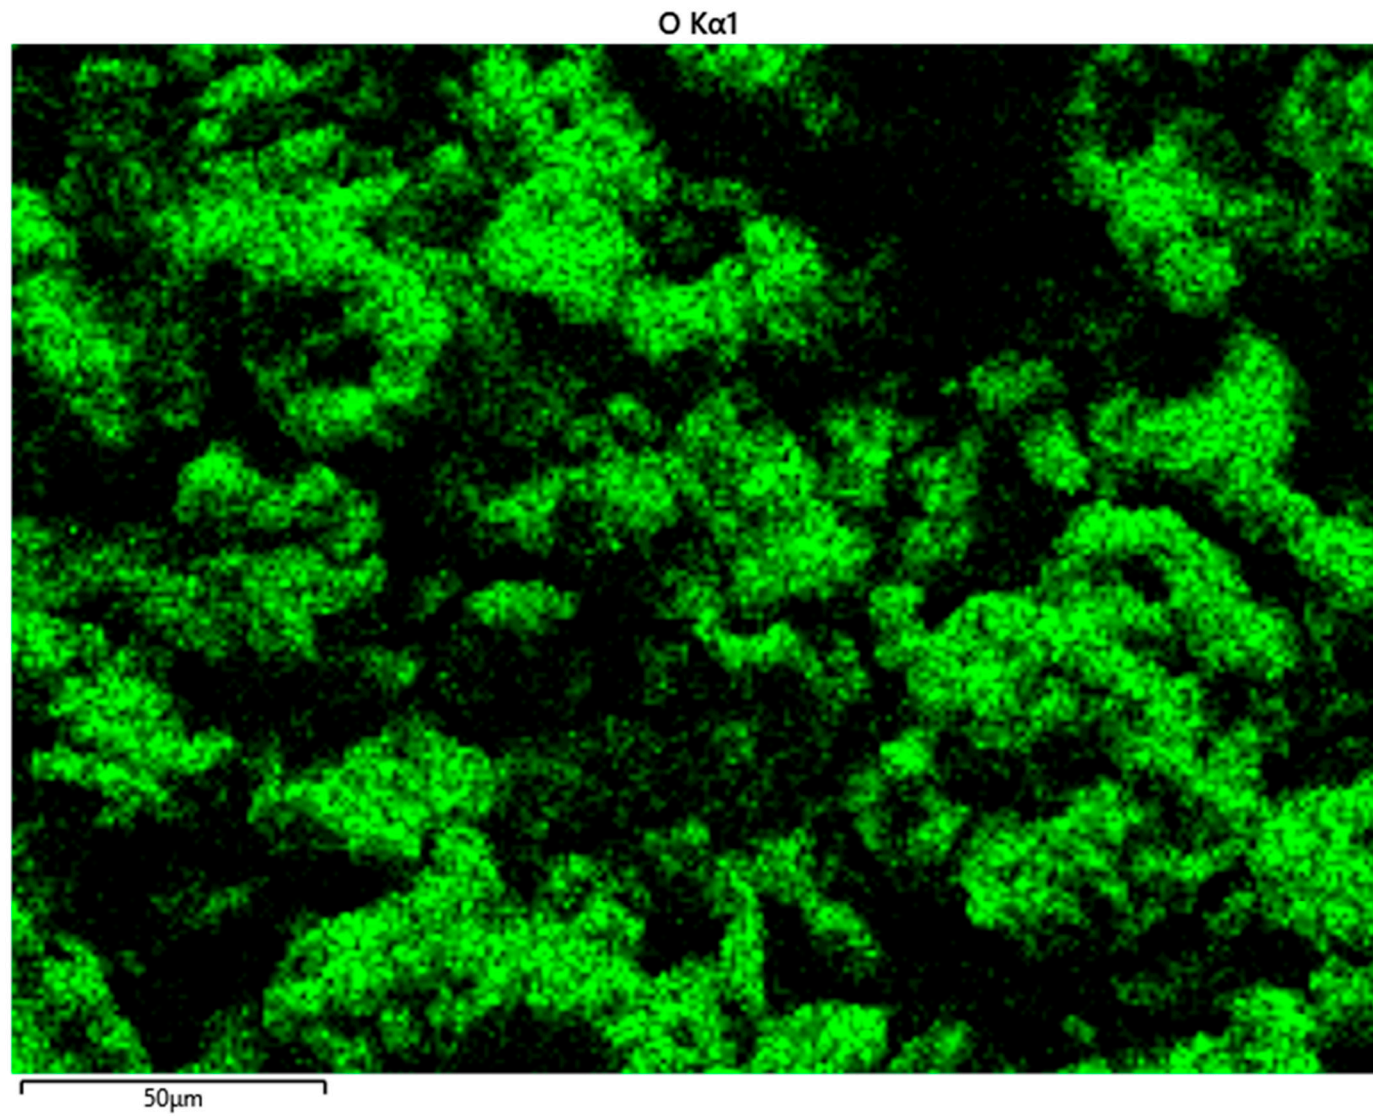

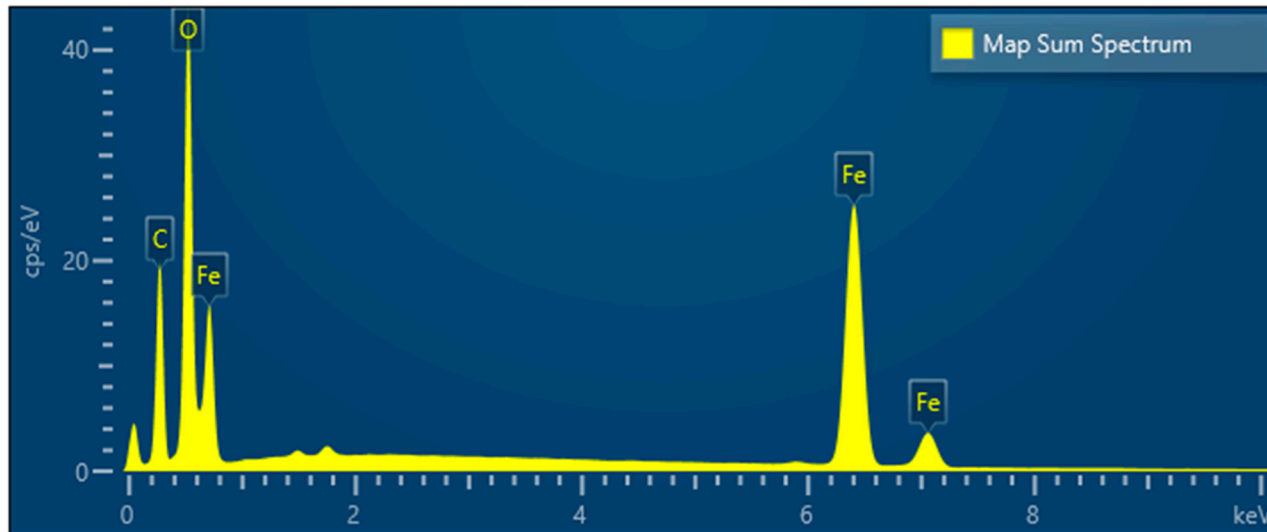

| Map Sum Spectrum |        |           |
|------------------|--------|-----------|
| Element          | Wt%    | Wt% Sigma |
| C                | 10.84  | 0.08      |
| O                | 12.97  | 0.07      |
| Fe               | 76.18  | 0.10      |
| Total:           | 100.00 |           |
